# Supplementary material for: Implementation of Evidence-Based Patient Safety Practices: 4-Years’ Follow-up of a Nationwide Regulatory Intervention in Brazilian Hospitals
Source: Research Square preprint supplement (doi:10.21203/rs.3.rs-1208512/v1), 2022-01-11
Supplement: Supplementary file 1 [file ab960d66b28a7d01c948d72d.docx]

**Implementation of evidence-based patient safety practices:**

**4-years’ follow-up of a nationwide regulatory intervention in Brazilian hospitals**

| **Appendix** 1 Characteristics of hospitals that participated in the Self-Assessment of Patient Safety Practices. Brazil, 2016 - 2019. | | | | | | | | |
| --- | --- | --- | --- | --- | --- | --- | --- | --- |
| **Year** | **2016*** | | **2017** | | **2018** | | **2019** | |
| **n (% response)** | **782 (40)** | | **980 (49)** | | **1093 (54)** | | **1255 (62)** | |
| **Properties/Nature** |  |  |  |  |  |  |  |  |
| Public | 218 | (28) | 299 | (31) | 323 | (30) | 390 | (31) |
| Private | 281 | (36) | 341 | (35) | 391 | (36) | 448 | (36) |
| philanthropic | 257 | (33) | 340 | (35) | 379 | (35) | 417 | (33) |
| **Unit Type** | | | | | | | | |
| General Hospital | 666 | (85) | 826 | (84) | 920 | (84) | 1056 | (84) |
| Specialised Hospital | 78 | (10) | 142 | (15) | 161 | (15) | 189 | (15) |
| Other | 12 | (2) | 12 | (1) | 12 | (1) | 10 | (1) |
| **Size** | | | | | | | | |
| Small (less than 100 beds) | 255 | (33) | 183 | (24) | 208 | (25) | 232 | (24) |
| Medium (100 to 199 beds) | 296 | (38) | 273 | (36) | 290 | (35) | 327 | (34) |
| Large (equal to or greater than 200 beds) | 231 | (30) | 29 | (4) | 36 | (4) | 40 | (4) |
| **Number of ICU Beds** | | | | | | | | |
| 1 to 9 | 139 | (18) | 122 | (16) | 120 | (14) | 137 | (14) |
| 10 to 19 | 257 | (33) | 218 | (29) | 247 | (30) | 309 | (32) |
| 20 or more | 386 | (49) | 367 | (48) | 404 | (48) | 450 | (47) |
| All data are absolute numbers and percentages are in parentheses. ICU: Intensive Care Unit. *In 2006, 26 hospitals without information. | | | | | | | | |
